# Supplementary material for: Transglutaminase 2 mediates hypoxia-induced selective mRNA translation via polyamination of 4EBPs
Source: Life Sci Alliance. 2020 Feb 19;3(3):e201900565. doi: 10.26508/lsa.201900565 (PMC7032569; doi:10.26508/lsa.201900565)
Supplement: Supplementary file 1 [file LSA-2019-00565_TableS1.xlsx]

## Sheet: Sheet1
Supplemental Table S1. Increased proteins in hypoxia compared to hypoxia + cystamine (Hypoxia-cys) condition
UniProtKB Accession	Description	Abundance Ratio: (Hypoxia-cys) / (Hypoxia)	Abundance Ratio Adj. P-Value: (Hypoxia-cys) / (Hypoxia)	Detected only in Hypoxia
Q9UK76	Hematological and neurological expressed 1 protein OS=Homo sapiens GN=HN1 PE=1 SV=3	0.01	4.59413e-17	O
Q15149	Plectin OS=Homo sapiens GN=PLEC PE=1 SV=3	0.01	4.59413e-17	O
P67775	Serine/threonine-protein phosphatase 2A catalytic subunit alpha isoform OS=Homo sapiens GN=PPP2CA PE=1 SV=1	0.01	4.59413e-17	O
P06899	Histone H2B type 1-J OS=Homo sapiens GN=HIST1H2BJ PE=1 SV=3	0.01	4.59413e-17	O
Q9HCY8	Protein S100-A14 OS=Homo sapiens GN=S100A14 PE=1 SV=1	0.01	4.59413e-17	O
Q9Y305-4	Isoform 4 of Acyl-coenzyme A thioesterase 9, mitochondrial OS=Homo sapiens GN=ACOT9	0.01	4.59413e-17	O
P14927	Cytochrome b-c1 complex subunit 7 OS=Homo sapiens GN=UQCRB PE=1 SV=2	0.01	4.59413e-17	O
Q16718	NADH dehydrogenase [ubiquinone] 1 alpha subcomplex subunit 5 OS=Homo sapiens GN=NDUFA5 PE=1 SV=3	0.01	4.59413e-17	O
Q9Y314	Nitric oxide synthase-interacting protein OS=Homo sapiens GN=NOSIP PE=1 SV=1	0.01	4.59413e-17	O
P11177	Pyruvate dehydrogenase E1 component subunit beta, mitochondrial OS=Homo sapiens GN=PDHB PE=1 SV=3	0.01	4.59413e-17	O
P01040	Cystatin-A OS=Homo sapiens GN=CSTA PE=1 SV=1	0.01	4.59413e-17	O
Q96BM9	ADP-ribosylation factor-like protein 8A OS=Homo sapiens GN=ARL8A PE=1 SV=1	0.01	4.59413e-17	O
P30086	Phosphatidylethanolamine-binding protein 1 OS=Homo sapiens GN=PEBP1 PE=1 SV=3	0.01	4.59413e-17	O
Q53QV2	Protein LBH OS=Homo sapiens GN=LBH PE=1 SV=1	0.01	4.59413e-17	O
Q9BRJ6	Uncharacterized protein C7orf50 OS=Homo sapiens GN=C7orf50 PE=1 SV=1	0.01	4.59413e-17	O
Q9NVJ2	ADP-ribosylation factor-like protein 8B OS=Homo sapiens GN=ARL8B PE=1 SV=1	0.01	4.59413e-17	O
O43715	TP53-regulated inhibitor of apoptosis 1 OS=Homo sapiens GN=TRIAP1 PE=1 SV=1	0.01	4.59413e-17	O
P06396	Gelsolin OS=Homo sapiens GN=GSN PE=1 SV=1	0.01	4.59413e-17	O
Q9Y508	E3 ubiquitin-protein ligase RNF114 OS=Homo sapiens GN=RNF114 PE=1 SV=1	0.01	4.59413e-17	O
Q7Z5L9	Interferon regulatory factor 2-binding protein 2 OS=Homo sapiens GN=IRF2BP2 PE=1 SV=2	0.01	4.59413e-17	O
P00167	Cytochrome b5 OS=Homo sapiens GN=CYB5A PE=1 SV=2	0.01	4.59413e-17	O
P14406	Cytochrome c oxidase subunit 7A2, mitochondrial OS=Homo sapiens GN=COX7A2 PE=1 SV=1	0.01	4.59413e-17	O
Q9Y5S9	RNA-binding protein 8A OS=Homo sapiens GN=RBM8A PE=1 SV=1	0.01	4.59413e-17	O
Q7L2H7	Eukaryotic translation initiation factor 3 subunit M OS=Homo sapiens GN=EIF3M PE=1 SV=1	0.01	4.59413e-17	O
P02511	Alpha-crystallin B chain OS=Homo sapiens GN=CRYAB PE=1 SV=2	0.01	4.59413e-17	O
P07954	Fumarate hydratase, mitochondrial OS=Homo sapiens GN=FH PE=1 SV=3	0.01	4.59413e-17	O
P56385	ATP synthase subunit e, mitochondrial OS=Homo sapiens GN=ATP5I PE=1 SV=2	0.01	4.59413e-17	O
P48506	Glutamate--cysteine ligase catalytic subunit OS=Homo sapiens GN=GCLC PE=1 SV=2	0.01	4.59413e-17	O
Q14165	Malectin OS=Homo sapiens GN=MLEC PE=1 SV=1	0.01	4.59413e-17	O
P08574	Cytochrome c1, heme protein, mitochondrial OS=Homo sapiens GN=CYC1 PE=1 SV=3	0.01	4.59413e-17	O
Q00534	Cyclin-dependent kinase 6 OS=Homo sapiens GN=CDK6 PE=1 SV=1	0.01	4.59413e-17	O
Q9NX55	Huntingtin-interacting protein K OS=Homo sapiens GN=HYPK PE=1 SV=2	0.01	4.59413e-17	O
P06702	Protein S100-A9 OS=Homo sapiens GN=S100A9 PE=1 SV=1	0.01	4.59413e-17	O
P04899-4	Isoform sGi2 of Guanine nucleotide-binding protein G(i) subunit alpha-2 OS=Homo sapiens GN=GNAI2	0.01	4.59413e-17	O
P62942	Peptidyl-prolyl cis-trans isomerase FKBP1A OS=Homo sapiens GN=FKBP1A PE=1 SV=2	0.01	4.59413e-17	O
Q9NQ88	Fructose-2,6-bisphosphatase TIGAR OS=Homo sapiens GN=TIGAR PE=1 SV=1	0.01	4.59413e-17	O
Q9UIJ7	GTP:AMP phosphotransferase AK3, mitochondrial OS=Homo sapiens GN=AK3 PE=1 SV=4	0.01	4.59413e-17	O
Q9BU61	NADH dehydrogenase [ubiquinone] 1 alpha subcomplex assembly factor 3 OS=Homo sapiens GN=NDUFAF3 PE=1 SV=1	0.01	4.59413e-17	O
Q9P0I2	ER membrane protein complex subunit 3 OS=Homo sapiens GN=EMC3 PE=1 SV=3	0.01	4.59413e-17	O
Q9NR31	GTP-binding protein SAR1a OS=Homo sapiens GN=SAR1A PE=1 SV=1	0.01	4.59413e-17	O
Q9H8Y8-3	Isoform 3 of Golgi reassembly-stacking protein 2 OS=Homo sapiens GN=GORASP2	0.01	4.59413e-17	O
P40855	Peroxisomal biogenesis factor 19 OS=Homo sapiens GN=PEX19 PE=1 SV=1	0.01	4.59413e-17	O
O43175	D-3-phosphoglycerate dehydrogenase OS=Homo sapiens GN=PHGDH PE=1 SV=4	0.01	4.59413e-17	O
Q9BRT6	Protein LLP homolog OS=Homo sapiens GN=LLPH PE=1 SV=1	0.01	4.59413e-17	O
O15514	DNA-directed RNA polymerase II subunit RPB4 OS=Homo sapiens GN=POLR2D PE=1 SV=1	0.01	4.59413e-17	O
Q5SRD1	Putative mitochondrial import inner membrane translocase subunit Tim23B OS=Homo sapiens GN=TIMM23B PE=5 SV=2	0.01	4.59413e-17	O
Q9Y3L5	Ras-related protein Rap-2c OS=Homo sapiens GN=RAP2C PE=1 SV=1	0.01	4.59413e-17	O
P61313	60S ribosomal protein L15 OS=Homo sapiens GN=RPL15 PE=1 SV=2	0.01	4.59413e-17	O
Q9Y6E2	Basic leucine zipper and W2 domain-containing protein 2 OS=Homo sapiens GN=BZW2 PE=1 SV=1	0.01	4.59413e-17	O
Q9Y5K5	Ubiquitin carboxyl-terminal hydrolase isozyme L5 OS=Homo sapiens GN=UCHL5 PE=1 SV=3	0.01	4.59413e-17	O
Q53FA7	Quinone oxidoreductase PIG3 OS=Homo sapiens GN=TP53I3 PE=1 SV=2	0.01	4.59413e-17	O
Q9P015	39S ribosomal protein L15, mitochondrial OS=Homo sapiens GN=MRPL15 PE=1 SV=1	0.01	4.59413e-17	O
Q96A33	Coiled-coil domain-containing protein 47 OS=Homo sapiens GN=CCDC47 PE=1 SV=1	0.01	4.59413e-17	O
P36551	Oxygen-dependent coproporphyrinogen-III oxidase, mitochondrial OS=Homo sapiens GN=CPOX PE=1 SV=3	0.01	4.59413e-17	O
P32119	Peroxiredoxin-2 OS=Homo sapiens GN=PRDX2 PE=1 SV=5	0.01	4.59413e-17	O
P46109	Crk-like protein OS=Homo sapiens GN=CRKL PE=1 SV=1	0.01	4.59413e-17	O
Q9NYL2-2	Isoform 2 of Mitogen-activated protein kinase kinase kinase 20 OS=Homo sapiens GN=MAP3K20	0.01	4.59413e-17	O
Q96EQ0	Small glutamine-rich tetratricopeptide repeat-containing protein beta OS=Homo sapiens GN=SGTB PE=1 SV=1	0.01	4.59413e-17	O
Q5T6V5	UPF0553 protein C9orf64 OS=Homo sapiens GN=C9orf64 PE=1 SV=1	0.01	4.59413e-17	O
Q9BY32	Inosine triphosphate pyrophosphatase OS=Homo sapiens GN=ITPA PE=1 SV=2	0.01	4.59413e-17	O
P56182	Ribosomal RNA processing protein 1 homolog A OS=Homo sapiens GN=RRP1 PE=1 SV=1	0.01	4.59413e-17	O
O43681	ATPase ASNA1 OS=Homo sapiens GN=ASNA1 PE=1 SV=2	0.01	4.59413e-17	O
P29323	Ephrin type-B receptor 2 OS=Homo sapiens GN=EPHB2 PE=1 SV=5	0.01	4.59413e-17	O
Q6DD88	Atlastin-3 OS=Homo sapiens GN=ATL3 PE=1 SV=1	0.01	4.59413e-17	O
Q9Y6K9-2	Isoform 2 of NF-kappa-B essential modulator OS=Homo sapiens GN=IKBKG	0.01	4.59413e-17	O
O43837	Isocitrate dehydrogenase [NAD] subunit beta, mitochondrial OS=Homo sapiens GN=IDH3B PE=1 SV=2	0.01	4.59413e-17	O
P48735	Isocitrate dehydrogenase [NADP], mitochondrial OS=Homo sapiens GN=IDH2 PE=1 SV=2	0.01	4.59413e-17	O
Q9H9B4	Sideroflexin-1 OS=Homo sapiens GN=SFXN1 PE=1 SV=4	0.01	4.59413e-17	O
Q8IXM3	39S ribosomal protein L41, mitochondrial OS=Homo sapiens GN=MRPL41 PE=1 SV=1	0.01	4.59413e-17	O
Q13526	Peptidyl-prolyl cis-trans isomerase NIMA-interacting 1 OS=Homo sapiens GN=PIN1 PE=1 SV=1	0.01	4.59413e-17	O
P21283	V-type proton ATPase subunit C 1 OS=Homo sapiens GN=ATP6V1C1 PE=1 SV=4	0.01	4.59413e-17	O
Q9UNF0	Protein kinase C and casein kinase substrate in neurons protein 2 OS=Homo sapiens GN=PACSIN2 PE=1 SV=2	0.01	4.59413e-17	O
Q14318-2	Isoform 2 of Peptidyl-prolyl cis-trans isomerase FKBP8 OS=Homo sapiens GN=FKBP8	0.01	4.59413e-17	O
Q6P1N9	Putative deoxyribonuclease TATDN1 OS=Homo sapiens GN=TATDN1 PE=1 SV=2	0.01	4.59413e-17	O
Q6P1K2-2	Isoform 2 of Polyamine-modulated factor 1 OS=Homo sapiens GN=PMF1	0.01	4.59413e-17	O
Q8NEZ5	F-box only protein 22 OS=Homo sapiens GN=FBXO22 PE=1 SV=1	0.01	4.59413e-17	O
P86790	Vacuolar fusion protein CCZ1 homolog B OS=Homo sapiens GN=CCZ1B PE=1 SV=1	0.01	4.59413e-17	O
O14602	Eukaryotic translation initiation factor 1A, Y-chromosomal OS=Homo sapiens GN=EIF1AY PE=1 SV=4	0.01	4.59413e-17	O
Q9HBH5	Retinol dehydrogenase 14 OS=Homo sapiens GN=RDH14 PE=1 SV=1	0.01	4.59413e-17	O
Q01658	Protein Dr1 OS=Homo sapiens GN=DR1 PE=1 SV=1	0.01	4.59413e-17	O
Q15102	Platelet-activating factor acetylhydrolase IB subunit gamma OS=Homo sapiens GN=PAFAH1B3 PE=1 SV=1	0.01	4.59413e-17	O
Q3ZCQ8-2	Isoform 2 of Mitochondrial import inner membrane translocase subunit TIM50 OS=Homo sapiens GN=TIMM50	0.01	4.59413e-17	O
Q99439	Calponin-2 OS=Homo sapiens GN=CNN2 PE=1 SV=4	0.01	4.59413e-17	O
Q9UNL2-2	Isoform 2 of Translocon-associated protein subunit gamma OS=Homo sapiens GN=SSR3	0.01	4.59413e-17	O
Q13451	Peptidyl-prolyl cis-trans isomerase FKBP5 OS=Homo sapiens GN=FKBP5 PE=1 SV=2	0.01	4.59413e-17	O
P80303	Nucleobindin-2 OS=Homo sapiens GN=NUCB2 PE=1 SV=2	0.01	4.59413e-17	O
Q13557-11	Isoform Delta 11 of Calcium/calmodulin-dependent protein kinase type II subunit delta OS=Homo sapiens GN=CAMK2D	0.01	4.59413e-17	O
P49257	Protein ERGIC-53 OS=Homo sapiens GN=LMAN1 PE=1 SV=2	0.01	4.59413e-17	O
Q13162	Peroxiredoxin-4 OS=Homo sapiens GN=PRDX4 PE=1 SV=1	0.01	4.59413e-17	O
Q8N5M9	Protein jagunal homolog 1 OS=Homo sapiens GN=JAGN1 PE=1 SV=1	0.01	4.59413e-17	O
Q9NUJ1	Mycophenolic acid acyl-glucuronide esterase, mitochondrial OS=Homo sapiens GN=ABHD10 PE=1 SV=1	0.01	4.59413e-17	O
Q9BY44	Eukaryotic translation initiation factor 2A OS=Homo sapiens GN=EIF2A PE=1 SV=3	0.01	4.59413e-17	O
P55042	GTP-binding protein RAD OS=Homo sapiens GN=RRAD PE=1 SV=2	0.01	4.59413e-17	O
P51452	Dual specificity protein phosphatase 3 OS=Homo sapiens GN=DUSP3 PE=1 SV=1	0.01	4.59413e-17	O
P11217	Glycogen phosphorylase, muscle form OS=Homo sapiens GN=PYGM PE=1 SV=6	0.01	4.59413e-17	O
O00214-2	Isoform 2 of Galectin-8 OS=Homo sapiens GN=LGALS8	0.01	4.59413e-17	O
P41227	N-alpha-acetyltransferase 10 OS=Homo sapiens GN=NAA10 PE=1 SV=1	0.01	4.59413e-17	O
O75937	DnaJ homolog subfamily C member 8 OS=Homo sapiens GN=DNAJC8 PE=1 SV=2	0.01	4.59413e-17	O
P47897	Glutamine--tRNA ligase OS=Homo sapiens GN=QARS PE=1 SV=1	0.01	4.59413e-17	O
Q9UBS3	DnaJ homolog subfamily B member 9 OS=Homo sapiens GN=DNAJB9 PE=1 SV=1	0.01	4.59413e-17	O
Q15637-5	Isoform 5 of Splicing factor 1 OS=Homo sapiens GN=SF1	0.01	4.59413e-17	O
Q01201	Transcription factor RelB OS=Homo sapiens GN=RELB PE=1 SV=2	0.01	4.59413e-17	O
Q7L014	Probable ATP-dependent RNA helicase DDX46 OS=Homo sapiens GN=DDX46 PE=1 SV=2	0.01	4.59413e-17	O
P41223-2	Isoform 2 of Protein BUD31 homolog OS=Homo sapiens GN=BUD31	0.01	4.59413e-17	O
Q92785	Zinc finger protein ubi-d4 OS=Homo sapiens GN=DPF2 PE=1 SV=2	0.01	4.59413e-17	O
Q6IN85	Serine/threonine-protein phosphatase 4 regulatory subunit 3A OS=Homo sapiens GN=PPP4R3A PE=1 SV=1	0.01	4.59413e-17	O
Q9NSI2	Protein FAM207A OS=Homo sapiens GN=FAM207A PE=1 SV=2	0.01	4.59413e-17	O
Q13405	39S ribosomal protein L49, mitochondrial OS=Homo sapiens GN=MRPL49 PE=1 SV=1	0.01	4.59413e-17	O
P34896	Serine hydroxymethyltransferase, cytosolic OS=Homo sapiens GN=SHMT1 PE=1 SV=1	0.01	4.59413e-17	O
Q96EK6	Glucosamine 6-phosphate N-acetyltransferase OS=Homo sapiens GN=GNPNAT1 PE=1 SV=1	0.01	4.59413e-17	O
Q9UHQ9	NADH-cytochrome b5 reductase 1 OS=Homo sapiens GN=CYB5R1 PE=1 SV=1	0.01	4.59413e-17	O
Q14197	Peptidyl-tRNA hydrolase ICT1, mitochondrial OS=Homo sapiens GN=MRPL58 PE=1 SV=1	0.01	4.59413e-17	O
Q5T3I0-3	Isoform 3 of G patch domain-containing protein 4 OS=Homo sapiens GN=GPATCH4	0.01	4.59413e-17	O
Q9NWQ9	Uncharacterized protein C14orf119 OS=Homo sapiens GN=C14orf119 PE=1 SV=1	0.01	4.59413e-17	O
Q96KG9	N-terminal kinase-like protein OS=Homo sapiens GN=SCYL1 PE=1 SV=1	0.01	4.59413e-17	O
P28070	Proteasome subunit beta type-4 OS=Homo sapiens GN=PSMB4 PE=1 SV=4	0.01	4.59413e-17	O
Q13636	Ras-related protein Rab-31 OS=Homo sapiens GN=RAB31 PE=1 SV=1	0.01	4.59413e-17	O
P52823	Stanniocalcin-1 OS=Homo sapiens GN=STC1 PE=1 SV=1	0.01	4.59413e-17	O
P15374	Ubiquitin carboxyl-terminal hydrolase isozyme L3 OS=Homo sapiens GN=UCHL3 PE=1 SV=1	0.01	4.59413e-17	O
Q02818	Nucleobindin-1 OS=Homo sapiens GN=NUCB1 PE=1 SV=4	0.01	4.59413e-17	O
Q8IVM0-2	Isoform 2 of Coiled-coil domain-containing protein 50 OS=Homo sapiens GN=CCDC50	0.01	4.59413e-17	O
A6NCE7	Microtubule-associated proteins 1A/1B light chain 3 beta 2 OS=Homo sapiens GN=MAP1LC3B2 PE=2 SV=1	0.01	4.59413e-17	O
Q9H467	CUE domain-containing protein 2 OS=Homo sapiens GN=CUEDC2 PE=1 SV=1	0.01	4.59413e-17	O
P54105	Methylosome subunit pICln OS=Homo sapiens GN=CLNS1A PE=1 SV=1	0.01	4.59413e-17	O
O75475	PC4 and SFRS1-interacting protein OS=Homo sapiens GN=PSIP1 PE=1 SV=1	0.01	4.59413e-17	O
P30154-2	Isoform 2 of Serine/threonine-protein phosphatase 2A 65 kDa regulatory subunit A beta isoform OS=Homo sapiens GN=PPP2R1B	0.01	4.59413e-17	O
P38606	V-type proton ATPase catalytic subunit A OS=Homo sapiens GN=ATP6V1A PE=1 SV=2	0.01	4.59413e-17	O
Q9UBQ7	Glyoxylate reductase/hydroxypyruvate reductase OS=Homo sapiens GN=GRHPR PE=1 SV=1	0.01	4.59413e-17	O
P18615-3	Isoform 2 of Negative elongation factor E OS=Homo sapiens GN=NELFE	0.01	4.59413e-17	O
Q15024	Exosome complex component RRP42 OS=Homo sapiens GN=EXOSC7 PE=1 SV=3	0.01	4.59413e-17	O
P06280	Alpha-galactosidase A OS=Homo sapiens GN=GLA PE=1 SV=1	0.01	4.59413e-17	O
P09913	Interferon-induced protein with tetratricopeptide repeats 2 OS=Homo sapiens GN=IFIT2 PE=1 SV=1	0.01	4.59413e-17	O
P17174	Aspartate aminotransferase, cytoplasmic OS=Homo sapiens GN=GOT1 PE=1 SV=3	0.01	4.59413e-17	O
Q9UQB8	Brain-specific angiogenesis inhibitor 1-associated protein 2 OS=Homo sapiens GN=BAIAP2 PE=1 SV=1	0.01	4.59413e-17	O
P28370	Probable global transcription activator SNF2L1 OS=Homo sapiens GN=SMARCA1 PE=1 SV=2	0.01	4.59413e-17	O
P56945-6	Isoform 6 of Breast cancer anti-estrogen resistance protein 1 OS=Homo sapiens GN=BCAR1	0.01	4.59413e-17	O
Q9Y570-4	Isoform 4 of Protein phosphatase methylesterase 1 OS=Homo sapiens GN=PPME1	0.01	4.59413e-17	O
Q14677-3	Isoform 3 of Clathrin interactor 1 OS=Homo sapiens GN=CLINT1	0.01	4.59413e-17	O
Q6NUQ4	Transmembrane protein 214 OS=Homo sapiens GN=TMEM214 PE=1 SV=2	0.01	4.59413e-17	O
Q15287	RNA-binding protein with serine-rich domain 1 OS=Homo sapiens GN=RNPS1 PE=1 SV=1	0.01	4.59413e-17	O
Q96BI3	Gamma-secretase subunit APH-1A OS=Homo sapiens GN=APH1A PE=1 SV=1	0.01	4.59413e-17	O
P49366	Deoxyhypusine synthase OS=Homo sapiens GN=DHPS PE=1 SV=1	0.01	4.59413e-17	O
P12955	Xaa-Pro dipeptidase OS=Homo sapiens GN=PEPD PE=1 SV=3	0.01	4.59413e-17	O
P53701	Cytochrome c-type heme lyase OS=Homo sapiens GN=HCCS PE=1 SV=1	0.01	4.59413e-17	O
Q96PZ0	Pseudouridylate synthase 7 homolog OS=Homo sapiens GN=PUS7 PE=1 SV=2	0.01	4.59413e-17	O
O00273	DNA fragmentation factor subunit alpha OS=Homo sapiens GN=DFFA PE=1 SV=1	0.01	4.59413e-17	O
Q86UL3	Glycerol-3-phosphate acyltransferase 4 OS=Homo sapiens GN=GPAT4 PE=1 SV=1	0.01	4.59413e-17	O
Q8WXA9-2	Isoform 2 of Splicing regulatory glutamine/lysine-rich protein 1 OS=Homo sapiens GN=SREK1	0.01	4.59413e-17	O
Q00796	Sorbitol dehydrogenase OS=Homo sapiens GN=SORD PE=1 SV=4	0.01	4.59413e-17	O
P49643	DNA primase large subunit OS=Homo sapiens GN=PRIM2 PE=1 SV=2	0.01	4.59413e-17	O
O00139-4	Isoform 4 of Kinesin-like protein KIF2A OS=Homo sapiens GN=KIF2A	0.01	4.59413e-17	O
Q9BRX2	Protein pelota homolog OS=Homo sapiens GN=PELO PE=1 SV=2	0.01	4.59413e-17	O
P51784	Ubiquitin carboxyl-terminal hydrolase 11 OS=Homo sapiens GN=USP11 PE=1 SV=3	0.01	4.59413e-17	O
Q8WWM7-3	Isoform 3 of Ataxin-2-like protein OS=Homo sapiens GN=ATXN2L	0.01	4.59413e-17	O
Q9H936	Mitochondrial glutamate carrier 1 OS=Homo sapiens GN=SLC25A22 PE=1 SV=1	0.01	4.59413e-17	O
Q8N1G4	Leucine-rich repeat-containing protein 47 OS=Homo sapiens GN=LRRC47 PE=1 SV=1	0.01	4.59413e-17	O
O75841	Uroplakin-1b OS=Homo sapiens GN=UPK1B PE=2 SV=5	0.01	4.59413e-17	O
Q9H4A4	Aminopeptidase B OS=Homo sapiens GN=RNPEP PE=1 SV=2	0.01	4.59413e-17	O
P35813-3	Isoform 3 of Protein phosphatase 1A OS=Homo sapiens GN=PPM1A	0.01	4.59413e-17	O
Q86X55	Histone-arginine methyltransferase CARM1 OS=Homo sapiens GN=CARM1 PE=1 SV=3	0.01	4.59413e-17	O
P50416	Carnitine O-palmitoyltransferase 1, liver isoform OS=Homo sapiens GN=CPT1A PE=1 SV=2	0.01	4.59413e-17	O
O95476	CTD nuclear envelope phosphatase 1 OS=Homo sapiens GN=CTDNEP1 PE=1 SV=2	0.01	4.59413e-17	O
Q9UHD9	Ubiquilin-2 OS=Homo sapiens GN=UBQLN2 PE=1 SV=2	0.01	4.59413e-17	O
Q9NVN3-1	Isoform 1 of Synembryn-B OS=Homo sapiens GN=RIC8B	0.01	4.59413e-17	O
Q9UBS4	DnaJ homolog subfamily B member 11 OS=Homo sapiens GN=DNAJB11 PE=1 SV=1	0.01	4.59413e-17	O
P42166	Lamina-associated polypeptide 2, isoform alpha OS=Homo sapiens GN=TMPO PE=1 SV=2	0.01	4.59413e-17	O
Q8IU81	Interferon regulatory factor 2-binding protein 1 OS=Homo sapiens GN=IRF2BP1 PE=1 SV=1	0.01	4.59413e-17	O
P06730-2	Isoform 2 of Eukaryotic translation initiation factor 4E OS=Homo sapiens GN=EIF4E	0.01	4.59413e-17	O
O60763-2	Isoform 2 of General vesicular transport factor p115 OS=Homo sapiens GN=USO1	0.01	4.59413e-17	O
Q05682	Caldesmon OS=Homo sapiens GN=CALD1 PE=1 SV=3	0.01	4.59413e-17	O
P00403	Cytochrome c oxidase subunit 2 OS=Homo sapiens GN=MT-CO2 PE=1 SV=1	0.01	4.59413e-17	O
Q13435	Splicing factor 3B subunit 2 OS=Homo sapiens GN=SF3B2 PE=1 SV=2	0.01	4.59413e-17	O
P10515	Dihydrolipoyllysine-residue acetyltransferase component of pyruvate dehydrogenase complex, mitochondrial OS=Homo sapiens GN=DLAT PE=1 SV=3	0.01	4.59413e-17	O
O75521	Enoyl-CoA delta isomerase 2, mitochondrial OS=Homo sapiens GN=ECI2 PE=1 SV=4	0.01	4.59413e-17	O
O95391	Pre-mRNA-splicing factor SLU7 OS=Homo sapiens GN=SLU7 PE=1 SV=2	0.01	4.59413e-17	O
Q9NYB0	Telomeric repeat-binding factor 2-interacting protein 1 OS=Homo sapiens GN=TERF2IP PE=1 SV=1	0.01	4.59413e-17	O
Q14683	Structural maintenance of chromosomes protein 1A OS=Homo sapiens GN=SMC1A PE=1 SV=2	0.01	4.59413e-17	O
Q92575	UBX domain-containing protein 4 OS=Homo sapiens GN=UBXN4 PE=1 SV=2	0.01	4.59413e-17	O
Q8TBC3	SH3KBP1-binding protein 1 OS=Homo sapiens GN=SHKBP1 PE=1 SV=2	0.01	4.59413e-17	O
O75150	E3 ubiquitin-protein ligase BRE1B OS=Homo sapiens GN=RNF40 PE=1 SV=4	0.01	4.59413e-17	O
P55735-3	Isoform 3 of Protein SEC13 homolog OS=Homo sapiens GN=SEC13	0.01	4.59413e-17	O
Q13155	Aminoacyl tRNA synthase complex-interacting multifunctional protein 2 OS=Homo sapiens GN=AIMP2 PE=1 SV=2	0.01	4.59413e-17	O
Q9Y2W2	WW domain-binding protein 11 OS=Homo sapiens GN=WBP11 PE=1 SV=1	0.01	4.59413e-17	O
Q96A65	Exocyst complex component 4 OS=Homo sapiens GN=EXOC4 PE=1 SV=1	0.01	4.59413e-17	O
P78330	Phosphoserine phosphatase OS=Homo sapiens GN=PSPH PE=1 SV=2	0.01	4.59413e-17	O
P42574	Caspase-3 OS=Homo sapiens GN=CASP3 PE=1 SV=2	0.01	4.59413e-17	O
Q9UKM9	RNA-binding protein Raly OS=Homo sapiens GN=RALY PE=1 SV=1	0.01	4.59413e-17	O
O14745	Na(+)/H(+) exchange regulatory cofactor NHE-RF1 OS=Homo sapiens GN=SLC9A3R1 PE=1 SV=4	0.01	4.59413e-17	O
Q9ULX3	RNA-binding protein NOB1 OS=Homo sapiens GN=NOB1 PE=1 SV=1	0.01	4.59413e-17	O
Q99661	Kinesin-like protein KIF2C OS=Homo sapiens GN=KIF2C PE=1 SV=2	0.01	4.59413e-17	O
O60313-2	Isoform 2 of Dynamin-like 120 kDa protein, mitochondrial OS=Homo sapiens GN=OPA1	0.01	4.59413e-17	O
O15260	Surfeit locus protein 4 OS=Homo sapiens GN=SURF4 PE=1 SV=3	0.01	4.59413e-17	O
Q15434	RNA-binding motif, single-stranded-interacting protein 2 OS=Homo sapiens GN=RBMS2 PE=1 SV=1	0.01	4.59413e-17	O
Q9UJ41	Rab5 GDP/GTP exchange factor OS=Homo sapiens GN=RABGEF1 PE=1 SV=2	0.01	4.59413e-17	O
P49356	Protein farnesyltransferase subunit beta OS=Homo sapiens GN=FNTB PE=1 SV=1	0.01	4.59413e-17	O
Q15653	NF-kappa-B inhibitor beta OS=Homo sapiens GN=NFKBIB PE=1 SV=2	0.01	4.59413e-17	O
Q9UKX7	Nuclear pore complex protein Nup50 OS=Homo sapiens GN=NUP50 PE=1 SV=2	0.01	4.59413e-17	O
O43818	U3 small nucleolar RNA-interacting protein 2 OS=Homo sapiens GN=RRP9 PE=1 SV=1	0.01	4.59413e-17	O
O14562	Ubiquitin domain-containing protein UBFD1 OS=Homo sapiens GN=UBFD1 PE=1 SV=2	0.01	4.59413e-17	O
Q05519	Serine/arginine-rich splicing factor 11 OS=Homo sapiens GN=SRSF11 PE=1 SV=1	0.01	4.59413e-17	O
Q6P9B6	TLD domain-containing protein 1 OS=Homo sapiens GN=TLDC1 PE=1 SV=2	0.01	4.59413e-17	O
O75694	Nuclear pore complex protein Nup155 OS=Homo sapiens GN=NUP155 PE=1 SV=1	0.01	4.59413e-17	O
P48426	Phosphatidylinositol 5-phosphate 4-kinase type-2 alpha OS=Homo sapiens GN=PIP4K2A PE=1 SV=2	0.01	4.59413e-17	O
Q14694-2	Isoform 2 of Ubiquitin carboxyl-terminal hydrolase 10 OS=Homo sapiens GN=USP10	0.01	4.59413e-17	O
Q96EK5	KIF1-binding protein OS=Homo sapiens GN=KIF1BP PE=1 SV=1	0.01	4.59413e-17	O
Q9Y5U2	Protein TSSC4 OS=Homo sapiens GN=TSSC4 PE=1 SV=3	0.01	4.59413e-17	O
Q9GZS1	DNA-directed RNA polymerase I subunit RPA49 OS=Homo sapiens GN=POLR1E PE=1 SV=2	0.01	4.59413e-17	O
Q8TDX7	Serine/threonine-protein kinase Nek7 OS=Homo sapiens GN=NEK7 PE=1 SV=1	0.01	4.59413e-17	O
Q8WU90	Zinc finger CCCH domain-containing protein 15 OS=Homo sapiens GN=ZC3H15 PE=1 SV=1	0.01	4.59413e-17	O
Q96DB5	Regulator of microtubule dynamics protein 1 OS=Homo sapiens GN=RMDN1 PE=1 SV=1	0.01	4.59413e-17	O
P20810-6	Isoform 6 of Calpastatin OS=Homo sapiens GN=CAST	0.01	4.59413e-17	O
Q9UMR2	ATP-dependent RNA helicase DDX19B OS=Homo sapiens GN=DDX19B PE=1 SV=1	0.01	4.59413e-17	O
Q96BN8	Ubiquitin thioesterase otulin OS=Homo sapiens GN=OTULIN PE=1 SV=3	0.01	4.59413e-17	O
P12694-2	Isoform 2 of 2-oxoisovalerate dehydrogenase subunit alpha, mitochondrial OS=Homo sapiens GN=BCKDHA	0.01	4.59413e-17	O
O95208	Epsin-2 OS=Homo sapiens GN=EPN2 PE=1 SV=3	0.01	4.59413e-17	O
Q14558-2	Isoform 2 of Phosphoribosyl pyrophosphate synthase-associated protein 1 OS=Homo sapiens GN=PRPSAP1	0.01	4.59413e-17	O
Q5TF58	Intermediate filament family orphan 2 OS=Homo sapiens GN=IFFO2 PE=2 SV=3	0.01	4.59413e-17	O
Q13136	Liprin-alpha-1 OS=Homo sapiens GN=PPFIA1 PE=1 SV=1	0.01	4.59413e-17	O
Q1ED39	Lysine-rich nucleolar protein 1 OS=Homo sapiens GN=KNOP1 PE=1 SV=1	0.01	4.59413e-17	O
Q9H814	Phosphorylated adapter RNA export protein OS=Homo sapiens GN=PHAX PE=1 SV=1	0.01	4.59413e-17	O
Q9UJM3	ERBB receptor feedback inhibitor 1 OS=Homo sapiens GN=ERRFI1 PE=1 SV=1	0.01	4.59413e-17	O
Q9H3P7	Golgi resident protein GCP60 OS=Homo sapiens GN=ACBD3 PE=1 SV=4	0.01	4.59413e-17	O
P42696	RNA-binding protein 34 OS=Homo sapiens GN=RBM34 PE=1 SV=2	0.01	4.59413e-17	O
O43813	LanC-like protein 1 OS=Homo sapiens GN=LANCL1 PE=1 SV=1	0.01	4.59413e-17	O
Q15054	DNA polymerase delta subunit 3 OS=Homo sapiens GN=POLD3 PE=1 SV=2	0.01	4.59413e-17	O
Q01780	Exosome component 10 OS=Homo sapiens GN=EXOSC10 PE=1 SV=2	0.01	4.59413e-17	O
P52655	Transcription initiation factor IIA subunit 1 OS=Homo sapiens GN=GTF2A1 PE=1 SV=1	0.01	4.59413e-17	O
Q9H7D7	WD repeat-containing protein 26 OS=Homo sapiens GN=WDR26 PE=1 SV=3	0.01	4.59413e-17	O
Q06546	GA-binding protein alpha chain OS=Homo sapiens GN=GABPA PE=1 SV=1	0.01	4.59413e-17	O
Q86TU7	Histone-lysine N-methyltransferase setd3 OS=Homo sapiens GN=SETD3 PE=1 SV=1	0.01	4.59413e-17	O
Q96RE7	Nucleus accumbens-associated protein 1 OS=Homo sapiens GN=NACC1 PE=1 SV=1	0.01	4.59413e-17	O
Q14692	Ribosome biogenesis protein BMS1 homolog OS=Homo sapiens GN=BMS1 PE=1 SV=1	0.01	4.59413e-17	O
Q9P0V3	SH3 domain-binding protein 4 OS=Homo sapiens GN=SH3BP4 PE=1 SV=1	0.01	4.59413e-17	O
Q9NX62	Inositol monophosphatase 3 OS=Homo sapiens GN=IMPAD1 PE=1 SV=1	0.01	4.59413e-17	O
O60907	F-box-like/WD repeat-containing protein TBL1X OS=Homo sapiens GN=TBL1X PE=1 SV=3	0.01	4.59413e-17	O
P40818	Ubiquitin carboxyl-terminal hydrolase 8 OS=Homo sapiens GN=USP8 PE=1 SV=1	0.01	4.59413e-17	O
Q9UEW8	STE20/SPS1-related proline-alanine-rich protein kinase OS=Homo sapiens GN=STK39 PE=1 SV=3	0.01	4.59413e-17	O
P36507	Dual specificity mitogen-activated protein kinase kinase 2 OS=Homo sapiens GN=MAP2K2 PE=1 SV=1	0.01	4.59413e-17	O
P41970	ETS domain-containing protein Elk-3 OS=Homo sapiens GN=ELK3 PE=1 SV=2	0.01	4.59413e-17	O
Q92538	Golgi-specific brefeldin A-resistance guanine nucleotide exchange factor 1 OS=Homo sapiens GN=GBF1 PE=1 SV=2	0.01	4.59413e-17	O
P49759-3	Isoform 3 of Dual specificity protein kinase CLK1 OS=Homo sapiens GN=CLK1	0.01	4.59413e-17	O
Q6NYC8	Phostensin OS=Homo sapiens GN=PPP1R18 PE=1 SV=1	0.01	4.59413e-17	O
Q53H12	Acylglycerol kinase, mitochondrial OS=Homo sapiens GN=AGK PE=1 SV=2	0.01	4.59413e-17	O
Q15398	Disks large-associated protein 5 OS=Homo sapiens GN=DLGAP5 PE=1 SV=2	0.01	4.59413e-17	O
Q9NZI7	Upstream-binding protein 1 OS=Homo sapiens GN=UBP1 PE=1 SV=1	0.01	4.59413e-17	O
Q9H488	GDP-fucose protein O-fucosyltransferase 1 OS=Homo sapiens GN=POFUT1 PE=1 SV=1	0.01	4.59413e-17	O
P23368	NAD-dependent malic enzyme, mitochondrial OS=Homo sapiens GN=ME2 PE=1 SV=1	0.01	4.59413e-17	O
Q9NNX1	Tuftelin OS=Homo sapiens GN=TUFT1 PE=1 SV=1	0.01	4.59413e-17	O
Q9C0C9	(E3-independent) E2 ubiquitin-conjugating enzyme OS=Homo sapiens GN=UBE2O PE=1 SV=3	0.01	4.59413e-17	O
O00400	Acetyl-coenzyme A transporter 1 OS=Homo sapiens GN=SLC33A1 PE=1 SV=1	0.01	4.59413e-17	O
Q52LJ0-2	Isoform 2 of Protein FAM98B OS=Homo sapiens GN=FAM98B	0.01	4.59413e-17	O
O15397	Importin-8 OS=Homo sapiens GN=IPO8 PE=1 SV=2	0.01	4.59413e-17	O
Q96KP1	Exocyst complex component 2 OS=Homo sapiens GN=EXOC2 PE=1 SV=1	0.01	4.59413e-17	O
Q9BUL5	PHD finger protein 23 OS=Homo sapiens GN=PHF23 PE=1 SV=1	0.01	4.59413e-17	O
Q9UNH7	Sorting nexin-6 OS=Homo sapiens GN=SNX6 PE=1 SV=1	0.01	4.59413e-17	O
Q9H4L4	Sentrin-specific protease 3 OS=Homo sapiens GN=SENP3 PE=1 SV=2	0.01	4.59413e-17	O
Q9Y2W1	Thyroid hormone receptor-associated protein 3 OS=Homo sapiens GN=THRAP3 PE=1 SV=2	0.01	4.59413e-17	O
Q7L7X3	Serine/threonine-protein kinase TAO1 OS=Homo sapiens GN=TAOK1 PE=1 SV=1	0.01	4.59413e-17	O
Q16850	Lanosterol 14-alpha demethylase OS=Homo sapiens GN=CYP51A1 PE=1 SV=3	0.01	4.59413e-17	O
Q96F86	Enhancer of mRNA-decapping protein 3 OS=Homo sapiens GN=EDC3 PE=1 SV=1	0.01	4.59413e-17	O
Q9UIQ6	Leucyl-cystinyl aminopeptidase OS=Homo sapiens GN=LNPEP PE=1 SV=3	0.01	4.59413e-17	O
Q8IWZ8	SURP and G-patch domain-containing protein 1 OS=Homo sapiens GN=SUGP1 PE=1 SV=2	0.01	4.59413e-17	O
O75844	CAAX prenyl protease 1 homolog OS=Homo sapiens GN=ZMPSTE24 PE=1 SV=2	0.01	4.59413e-17	O
Q9HCC0	Methylcrotonoyl-CoA carboxylase beta chain, mitochondrial OS=Homo sapiens GN=MCCC2 PE=1 SV=1	0.01	4.59413e-17	O
P09914	Interferon-induced protein with tetratricopeptide repeats 1 OS=Homo sapiens GN=IFIT1 PE=1 SV=2	0.01	4.59413e-17	O
P49753	Acyl-coenzyme A thioesterase 2, mitochondrial OS=Homo sapiens GN=ACOT2 PE=1 SV=6	0.01	4.59413e-17	O
Q5T8D3	Acyl-CoA-binding domain-containing protein 5 OS=Homo sapiens GN=ACBD5 PE=1 SV=1	0.01	4.59413e-17	O
O15067	Phosphoribosylformylglycinamidine synthase OS=Homo sapiens GN=PFAS PE=1 SV=4	0.01	4.59413e-17	O
Q7Z4V5	Hepatoma-derived growth factor-related protein 2 OS=Homo sapiens GN=HDGFRP2 PE=1 SV=1	0.01	4.59413e-17	O
Q92754	Transcription factor AP-2 gamma OS=Homo sapiens GN=TFAP2C PE=1 SV=1	0.01	4.59413e-17	O
Q96P70	Importin-9 OS=Homo sapiens GN=IPO9 PE=1 SV=3	0.01	4.59413e-17	O
Q16533	snRNA-activating protein complex subunit 1 OS=Homo sapiens GN=SNAPC1 PE=1 SV=1	0.01	4.59413e-17	O
Q15208	Serine/threonine-protein kinase 38 OS=Homo sapiens GN=STK38 PE=1 SV=1	0.01	4.59413e-17	O
P19474	E3 ubiquitin-protein ligase TRIM21 OS=Homo sapiens GN=TRIM21 PE=1 SV=1	0.01	4.59413e-17	O
Q5JRA6	Melanoma inhibitory activity protein 3 OS=Homo sapiens GN=MIA3 PE=1 SV=1	0.01	4.59413e-17	O
Q53F19	Nuclear cap-binding protein subunit 3 OS=Homo sapiens GN=NCBP3 PE=1 SV=2	0.01	4.59413e-17	O
O14657	Torsin-1B OS=Homo sapiens GN=TOR1B PE=1 SV=2	0.01	4.59413e-17	O
Q9UIG0	Tyrosine-protein kinase BAZ1B OS=Homo sapiens GN=BAZ1B PE=1 SV=2	0.01	4.59413e-17	O
Q9UNX4	WD repeat-containing protein 3 OS=Homo sapiens GN=WDR3 PE=1 SV=1	0.01	4.59413e-17	O
Q9BTV4	Transmembrane protein 43 OS=Homo sapiens GN=TMEM43 PE=1 SV=1	0.01	4.59413e-17	O
Q8N5V2	Ephexin-1 OS=Homo sapiens GN=NGEF PE=1 SV=2	0.01	4.59413e-17	O
P21399	Cytoplasmic aconitate hydratase OS=Homo sapiens GN=ACO1 PE=1 SV=3	0.01	4.59413e-17	O
Q9UBT7	Alpha-catulin OS=Homo sapiens GN=CTNNAL1 PE=1 SV=2	0.01	4.59413e-17	O
Q8WTT2	Nucleolar complex protein 3 homolog OS=Homo sapiens GN=NOC3L PE=1 SV=1	0.01	4.59413e-17	O
Q9Y2U8	Inner nuclear membrane protein Man1 OS=Homo sapiens GN=LEMD3 PE=1 SV=2	0.01	4.59413e-17	O
Q14166	Tubulin--tyrosine ligase-like protein 12 OS=Homo sapiens GN=TTLL12 PE=1 SV=2	0.01	4.59413e-17	O
Q9BV38	WD repeat-containing protein 18 OS=Homo sapiens GN=WDR18 PE=1 SV=2	0.01	4.59413e-17	O
Q05655-2	Isoform 2 of Protein kinase C delta type OS=Homo sapiens GN=PRKCD	0.01	4.59413e-17	O
O95347	Structural maintenance of chromosomes protein 2 OS=Homo sapiens GN=SMC2 PE=1 SV=2	0.01	4.59413e-17	O
Q86XZ4	Spermatogenesis-associated serine-rich protein 2 OS=Homo sapiens GN=SPATS2 PE=1 SV=1	0.01	4.59413e-17	O
P40222	Alpha-taxilin OS=Homo sapiens GN=TXLNA PE=1 SV=3	0.01	4.59413e-17	O
Q96JY6-5	Isoform 5 of PDZ and LIM domain protein 2 OS=Homo sapiens GN=PDLIM2	0.01	4.59413e-17	O
Q8NHV4-3	Isoform 3 of Protein NEDD1 OS=Homo sapiens GN=NEDD1	0.01	4.59413e-17	O
Q9UBP0	Spastin OS=Homo sapiens GN=SPAST PE=1 SV=1	0.01	4.59413e-17	O
Q5T0F9-2	Isoform 2 of Coiled-coil and C2 domain-containing protein 1B OS=Homo sapiens GN=CC2D1B	0.01	4.59413e-17	O
Q9BVI4	Nucleolar complex protein 4 homolog OS=Homo sapiens GN=NOC4L PE=1 SV=1	0.01	4.59413e-17	O
Q13131-2	Isoform 2 of 5'-AMP-activated protein kinase catalytic subunit alpha-1 OS=Homo sapiens GN=PRKAA1	0.01	4.59413e-17	O
Q9UPT8	Zinc finger CCCH domain-containing protein 4 OS=Homo sapiens GN=ZC3H4 PE=1 SV=3	0.01	4.59413e-17	O
P15144	Aminopeptidase N OS=Homo sapiens GN=ANPEP PE=1 SV=4	0.01	4.59413e-17	O
P00734	Prothrombin OS=Homo sapiens GN=F2 PE=1 SV=2	0.01	4.59413e-17	O
Q9NX02	NACHT, LRR and PYD domains-containing protein 2 OS=Homo sapiens GN=NLRP2 PE=1 SV=1	0.01	4.59413e-17	O
O43148-2	Isoform 2 of mRNA cap guanine-N7 methyltransferase OS=Homo sapiens GN=RNMT	0.01	4.59413e-17	O
Q70J99-3	Isoform 3 of Protein unc-13 homolog D OS=Homo sapiens GN=UNC13D	0.01	4.59413e-17	O
Q08554	Desmocollin-1 OS=Homo sapiens GN=DSC1 PE=1 SV=2	0.01	4.59413e-17	O
Q15813-2	Isoform 2 of Tubulin-specific chaperone E OS=Homo sapiens GN=TBCE	0.01	4.59413e-17	O
Q8N684-3	Isoform 3 of Cleavage and polyadenylation specificity factor subunit 7 OS=Homo sapiens GN=CPSF7	0.01	4.59413e-17	O
Q8IY81	pre-rRNA processing protein FTSJ3 OS=Homo sapiens GN=FTSJ3 PE=1 SV=2	0.01	4.59413e-17	O
Q9BXP5	Serrate RNA effector molecule homolog OS=Homo sapiens GN=SRRT PE=1 SV=1	0.01	4.59413e-17	O
Q96L92	Sorting nexin-27 OS=Homo sapiens GN=SNX27 PE=1 SV=2	0.01	4.59413e-17	O
Q8TCJ2	Dolichyl-diphosphooligosaccharide--protein glycosyltransferase subunit STT3B OS=Homo sapiens GN=STT3B PE=1 SV=1	0.01	4.59413e-17	O
P19838-2	Isoform 2 of Nuclear factor NF-kappa-B p105 subunit OS=Homo sapiens GN=NFKB1	0.01	4.59413e-17	O
Q13724	Mannosyl-oligosaccharide glucosidase OS=Homo sapiens GN=MOGS PE=1 SV=5	0.01	4.59413e-17	O
P78332	RNA-binding protein 6 OS=Homo sapiens GN=RBM6 PE=1 SV=5	0.01	4.59413e-17	O
Q96RN5	Mediator of RNA polymerase II transcription subunit 15 OS=Homo sapiens GN=MED15 PE=1 SV=2	0.01	4.59413e-17	O
P18084	Integrin beta-5 OS=Homo sapiens GN=ITGB5 PE=1 SV=1	0.01	4.59413e-17	O
Q9P0U4-2	Isoform 2 of CXXC-type zinc finger protein 1 OS=Homo sapiens GN=CXXC1	0.01	4.59413e-17	O
O00391	Sulfhydryl oxidase 1 OS=Homo sapiens GN=QSOX1 PE=1 SV=3	0.01	4.59413e-17	O
Q9UPT9	Ubiquitin carboxyl-terminal hydrolase 22 OS=Homo sapiens GN=USP22 PE=1 SV=2	0.01	4.59413e-17	O
P49790-3	Isoform 3 of Nuclear pore complex protein Nup153 OS=Homo sapiens GN=NUP153	0.01	4.59413e-17	O
Q15678	Tyrosine-protein phosphatase non-receptor type 14 OS=Homo sapiens GN=PTPN14 PE=1 SV=2	0.01	4.59413e-17	O
Q9H4G0	Band 4.1-like protein 1 OS=Homo sapiens GN=EPB41L1 PE=1 SV=2	0.01	4.59413e-17	O
Q9NRA8-3	Isoform 3 of Eukaryotic translation initiation factor 4E transporter OS=Homo sapiens GN=EIF4ENIF1	0.01	4.59413e-17	O
Q96BY6	Dedicator of cytokinesis protein 10 OS=Homo sapiens GN=DOCK10 PE=1 SV=3	0.01	4.59413e-17	O
Q53EP0	Fibronectin type III domain-containing protein 3B OS=Homo sapiens GN=FNDC3B PE=1 SV=2	0.01	4.59413e-17	O
O94804	Serine/threonine-protein kinase 10 OS=Homo sapiens GN=STK10 PE=1 SV=1	0.01	4.59413e-17	O
Q13523	Serine/threonine-protein kinase PRP4 homolog OS=Homo sapiens GN=PRPF4B PE=1 SV=3	0.01	4.59413e-17	O
Q9NXH9	tRNA (guanine(26)-N(2))-dimethyltransferase OS=Homo sapiens GN=TRMT1 PE=1 SV=1	0.01	4.59413e-17	O
A0FGR8-6	Isoform 6 of Extended synaptotagmin-2 OS=Homo sapiens GN=ESYT2	0.01	4.59413e-17	O
O43719	HIV Tat-specific factor 1 OS=Homo sapiens GN=HTATSF1 PE=1 SV=1	0.01	4.59413e-17	O
Q69YH5	Cell division cycle-associated protein 2 OS=Homo sapiens GN=CDCA2 PE=1 SV=2	0.01	4.59413e-17	O
P51693-2	Isoform 2 of Amyloid-like protein 1 OS=Homo sapiens GN=APLP1	0.01	4.59413e-17	O
Q9H2G4	Testis-specific Y-encoded-like protein 2 OS=Homo sapiens GN=TSPYL2 PE=1 SV=1	0.01	4.59413e-17	O
Q7Z460	CLIP-associating protein 1 OS=Homo sapiens GN=CLASP1 PE=1 SV=1	0.01	4.59413e-17	O
O14617-5	Isoform 5 of AP-3 complex subunit delta-1 OS=Homo sapiens GN=AP3D1	0.01	4.59413e-17	O
Q8IX01	SURP and G-patch domain-containing protein 2 OS=Homo sapiens GN=SUGP2 PE=1 SV=2	0.01	4.59413e-17	O
O75962	Triple functional domain protein OS=Homo sapiens GN=TRIO PE=1 SV=2	0.01	4.59413e-17	O
Q3V6T2	Girdin OS=Homo sapiens GN=CCDC88A PE=1 SV=2	0.01	4.59413e-17	O
Q8WYP5-2	Isoform 2 of Protein ELYS OS=Homo sapiens GN=AHCTF1	0.01	4.59413e-17	O
Q9UQ35	Serine/arginine repetitive matrix protein 2 OS=Homo sapiens GN=SRRM2 PE=1 SV=2	0.01	4.59413e-17	O
Q9P2D1	Chromodomain-helicase-DNA-binding protein 7 OS=Homo sapiens GN=CHD7 PE=1 SV=3	0.01	4.59413e-17	O
Q15746	Myosin light chain kinase, smooth muscle OS=Homo sapiens GN=MYLK PE=1 SV=4	0.01	4.59413e-17	O
Q709C8	Vacuolar protein sorting-associated protein 13C OS=Homo sapiens GN=VPS13C PE=1 SV=1	0.01	4.59413e-17	O
O43414	ERI1 exoribonuclease 3 OS=Homo sapiens GN=ERI3 PE=1 SV=2	0.039	1.37258e-06	X
Q04206	Transcription factor p65 OS=Homo sapiens GN=RELA PE=1 SV=2	0.043	3.35352e-06	X
Q9GZU8	Protein FAM192A OS=Homo sapiens GN=FAM192A PE=1 SV=1	0.054	2.09262e-05	X
Q9BT78	COP9 signalosome complex subunit 4 OS=Homo sapiens GN=COPS4 PE=1 SV=1	0.078	0.000322215	X
P63220	40S ribosomal protein S21 OS=Homo sapiens GN=RPS21 PE=1 SV=1	0.098	0.00152798	X
Q96G21	U3 small nucleolar ribonucleoprotein protein IMP4 OS=Homo sapiens GN=IMP4 PE=1 SV=1	0.102	0.00192576	X
Q9UQN3	Charged multivesicular body protein 2b OS=Homo sapiens GN=CHMP2B PE=1 SV=1	0.103	0.00204076	X
P43246	DNA mismatch repair protein Msh2 OS=Homo sapiens GN=MSH2 PE=1 SV=1	0.104	0.002196	X
Q8WZA9	Immunity-related GTPase family Q protein OS=Homo sapiens GN=IRGQ PE=1 SV=1	0.106	0.00245637	X
Q9UJF2-2	Isoform 2 of Ras GTPase-activating protein nGAP OS=Homo sapiens GN=RASAL2	0.109	0.00278892	X
P30048	Thioredoxin-dependent peroxide reductase, mitochondrial OS=Homo sapiens GN=PRDX3 PE=1 SV=3	0.109	0.00279946	X
P57740	Nuclear pore complex protein Nup107 OS=Homo sapiens GN=NUP107 PE=1 SV=1	0.111	0.0030809	X
P02668	Kappa-casein OS=Bos taurus GN=CSN3 PE=1 SV=1	0.113	0.00343751	X
Q96EK9	Protein KTI12 homolog OS=Homo sapiens GN=KTI12 PE=1 SV=1	0.124	0.00589303	X
P99999	Cytochrome c OS=Homo sapiens GN=CYCS PE=1 SV=2	0.125	0.00605189	X
Q9C086	INO80 complex subunit B OS=Homo sapiens GN=INO80B PE=1 SV=2	0.136	0.00953309	X
Q9P2N5	RNA-binding protein 27 OS=Homo sapiens GN=RBM27 PE=1 SV=2	0.139	0.0106822	X
Q6ZMT4	Lysine-specific demethylase 7A OS=Homo sapiens GN=KDM7A PE=1 SV=2	0.14	0.0111498	X
Q9H9Y6-3	Isoform 3 of DNA-directed RNA polymerase I subunit RPA2 OS=Homo sapiens GN=POLR1B	0.14	0.0112789	X
Q13951-2	Isoform 2 of Core-binding factor subunit beta OS=Homo sapiens GN=CBFB	0.143	0.0125778	X
Q92797	Symplekin OS=Homo sapiens GN=SYMPK PE=1 SV=2	0.153	0.0174984	X
Q13123	Protein Red OS=Homo sapiens GN=IK PE=1 SV=3	0.154	0.0179133	X
P25815	Protein S100-P OS=Homo sapiens GN=S100P PE=1 SV=2	0.157	0.0198413	X
Q16643-3	Isoform 3 of Drebrin OS=Homo sapiens GN=DBN1	0.158	0.0206947	X
O14776	Transcription elongation regulator 1 OS=Homo sapiens GN=TCERG1 PE=1 SV=2	0.159	0.0208714	X
Q96CM8-2	Isoform 2 of Acyl-CoA synthetase family member 2, mitochondrial OS=Homo sapiens GN=ACSF2	0.159	0.0208806	X
O00264	Membrane-associated progesterone receptor component 1 OS=Homo sapiens GN=PGRMC1 PE=1 SV=3	0.161	0.0227502	X
Q13409	Cytoplasmic dynein 1 intermediate chain 2 OS=Homo sapiens GN=DYNC1I2 PE=1 SV=3	0.166	0.0260452	X
P13798	Acylamino-acid-releasing enzyme OS=Homo sapiens GN=APEH PE=1 SV=4	0.166	0.0261774	X
O14639	Actin-binding LIM protein 1 OS=Homo sapiens GN=ABLIM1 PE=1 SV=3	0.184	0.0420334	X
Q99685	Monoglyceride lipase OS=Homo sapiens GN=MGLL PE=1 SV=2	0.186	0.0438261	X
O00425	Insulin-like growth factor 2 mRNA-binding protein 3 OS=Homo sapiens GN=IGF2BP3 PE=1 SV=2	0.189	0.0471031	X
Q8N960-2	Isoform 2 of Centrosomal protein of 120 kDa OS=Homo sapiens GN=CEP120	0.19	0.0479665	X
