# Supplementary material for: Transglutaminase 2 mediates hypoxia-induced selective mRNA translation via polyamination of 4EBPs
Source: Life Sci Alliance. 2020 Feb 19;3(3):e201900565. doi: 10.26508/lsa.201900565 (PMC7032569; doi:10.26508/lsa.201900565)
Supplement: Supplementary file 3 [file LSA-2019-00565_TableS3.xlsx]

## Sheet: Sheet1
Supplemental Table S3. Gene ontology (GO) analysis for up-regulated proteins in hypoxia compared to hypoxia+cystamine condition
GO_Term	Gene Count	%	P-Value	Gene list
cell-cell adhesion	19	6	1.3e-06	BAIAP2	CRKL	S100P	SCYL1	BZW2	CALD1	CNN2	CHMP2B	EPN2	EPB41L1	EIF2A	PLEC	PACSIN2	RPL15	STK38	TMPO	UBFD1	USP8	ZC3H15
rRNA processing	15	4.7	2.4e-05	BMS1	IMP4	NOB1	SENP3	WDR18	WDR3	WBP11	CHD7	EXOSC10	EXOSC7	NOC4L	RRP1	RRP9	RPL15	RPS21
tricarboxylic acid cycle	6	1.9	0.00013	ACO1	DLAT	FH	IDH2	IDH3B	PDHB
mRNA splicing, via spliceosome	14	4.4	0.00014	DDX46	DNAJC8	HTATSF1	RALY	RBM8A	RNPS1	POLR2D	SLU7	SUGP1	PRPF4B	SRSF11	SRRM2	SRRT	SF3B2
regulation of macroautophagy	6	1.9	0.00096	ATP6V1A	ATP6V1C1	CASP3	EXOC4	SNX6	UBQLN2
endoplasmic reticulum organization	5	1.6	0.0011	ATL3	CCDC47	JAGN1	LMAN1	TOR1B
mRNA export from nucleus	8	2.5	0.0018	DDX19B	RBM8A	RNPS1	SLU7	NUP107	NUP155	NUP50	SRSF11
nuclear envelope organization	4	1.3	0.0041	CTDNEP1	LEMD3	NUP155	ZMPSTE24
RNA splicing	9	2.8	0.0086	RBM8A	RNPS1	SUGP2	WBP11	PRPF4B	PPP2CA	SRSF11	SF3B2	THRAP3
RNA export from nucleus	5	1.6	0.015	RBM8A	RNPS1	SLU7	NUP155	SRSF11
protein import into nucleus	5	1.6	0.018	IPO8	IPO9	NUP107	NUP155	NUP50
ER-associated ubiquitin-dependent protein catabolic process	5	1.6	0.02	DNAJB9	STT3B	UBXN4	CCDC47	UBQLN2
response to arsenic-containing substance	3	0.9	0.021	CPOX	GCLC	SRRT
RNA processing	6	1.9	0.027	RBM6	RBMS2	SUGP1	SUGP2	WBP11	EXOSC10
mitochondrial electron transport, ubiquinol to cytochrome c	3	0.9	0.027	CYCS	CYC1	UQCRB
protein deubiquitination	6	1.9	0.029	SHMT1	UCHL3	UCHL5	USP11	USP22	USP8
snRNA transcription from RNA polymerase II promoter	5	1.6	0.034	POLR2D	GTF2A1	PHAX	SRRT	SNAPC1
2-oxoglutarate metabolic process	3	0.9	0.038	GOT1	IDH2	IDH3B
Golgi organization	5	1.6	0.04	ATL3	CLASP1	GBF1	LMAN1	SURF4
mitotic nuclear envelope disassembly	4	1.3	0.041	CTDNEP1	NUP107	NUP155	NUP50
cell redox homeostasis	5	1.6	0.045	GCLC	PRDX2	PRDX3	PRDX4	QSOX1
wound healing	5	1.6	0.051
positive regulation of protein dephosphorylation	3	0.9	0.051
oxidation-reduction process	17	5.4	0.055
peptide catabolic process	3	0.9	0.055
pyruvate metabolic process	3	0.9	0.055
mRNA 3'-end processing	4	1.3	0.056
nuclear-transcribed mRNA catabolic process, nonsense-mediated decay	6	1.9	0.057
ER to Golgi vesicle-mediated transport	7	2.2	0.061
regulation of translation	4	1.3	0.062
positive regulation of organelle organization	2	0.6	0.068
nuclear membrane organization	2	0.6	0.068
L-serine biosynthetic process	2	0.6	0.068
response to cadmium ion	3	0.9	0.07
translation	9	2.8	0.075
glyoxylate metabolic process	3	0.9	0.075
negative regulation of protein binding	4	1.3	0.077
negative regulation of ERK1 and ERK2 cascade	4	1.3	0.08
IRE1-mediated unfolded protein response	4	1.3	0.083
negative regulation of cell migration	5	1.6	0.084
isocitrate metabolic process	2	0.6	0.084
nucleotide-binding oligomerization domain containing 2 signaling pathway	2	0.6	0.084
cell cycle	8	2.5	0.085
response to organic substance	3	0.9	0.085
protein homooligomerization	7	2.2	0.089
protein folding	7	2.2	0.094
regulation of gene expression	5	1.6	0.097
ubiquitin-dependent protein catabolic process	7	2.2	0.098
ribosome assembly	2	0.6	0.1
protein exit from endoplasmic reticulum	2	0.6	0.1
nuclear polyadenylation-dependent rRNA catabolic process	2	0.6	0.1
amyloid fibril formation	2	0.6	0.1
L-serine metabolic process	2	0.6	0.1
