# Supplementary material for: Transglutaminase 2 mediates hypoxia-induced selective mRNA translation via polyamination of 4EBPs
Source: Life Sci Alliance. 2020 Feb 19;3(3):e201900565. doi: 10.26508/lsa.201900565 (PMC7032569; doi:10.26508/lsa.201900565)
Supplement: Supplementary file 5 [file LSA-2019-00565_TableS5.xlsx]

## Sheet: Sheet1
Supplemental Table S5. Hallmark gene set analysis for up-regulated proteins in hypoxia compared to hypoxia+cystamine condition
Gene Symbol
CPT1A	X			X
FH	X			X
HCCS	X			X
IDH3B	X			X
PDHB	X			X
PRDX3	X					X			X
CYC1	X					X			X
DLAT	X					X
MRPL15	X					X
NDUFA5	X					X
BCKDHA	X					X
IDH2	X												X
CYB5A	X													X		X
ATP6V1C1	X																								X
COX7A2	X
OPA1	X
ATP5I	X
CYCS	X
UQCRB	X
TIMM50	X
KIF2C		X					X	X
SMC1A		X					X	X
HN1		X					X
PRIM2		X					X
TMPO		X					X
DLGAP5		X						X
PRDX4		X							X														X
POLD3		X															X
MSH2		X
PSIP1		X
NUP107		X
SHMT1		X
NUP153		X
RRP9			X		X				X	X
SORD			X							X	X		X
GLA			X										X							X				X
SLC9A3R1			X										X							X
GCLC			X											X		X							X					X
STC1			X											X
GOT1			X											X
NFKBIB			X															X
USO1			X																					X
CYP51A1			X
PHGDH			X
UCHL5			X
PSPH			X
MGLL				X		X
CPOX				X																								X
ECI2				X
GRHPR				X
ACOT2				X
DNAJB9					X	X					X
EIF4E					X				X									X
IFIT1					X																X
TSPYL2					X																								X
CXXC1					X
EXOSC10					X
EXOC2					X
MYLK						X													X			X
JAGN1						X
RASAL2							X	X
SMC2							X
NUP50							X
DR1							X
PRPF4B							X
BCAR1								X								X
GSN								X														X					X
ARL8A								X
CLASP1								X
CCDC88A								X
TRIO								X
AIMP2									X	X
RNPS1									X
CLNS1A									X
EXOSC7									X
NOC4L										X
IMP4										X
FKBP5											X		X							X
LMAN1											X													X
CDK6											X
STK39											X
S100A9												X	X
KIF2A												X		X
GNAI2												X			X
CASP3												X									X				X		X
PRKCD												X													X
F2												X															X
DOCK10												X
USP8												X
RAB31													X							X						X
TFAP2C													X							X
AK3														X			X
QSOX1														X					X
ME2														X
BAIAP2															X														X
CNN2															X
DSC1															X
EXOC4															X
SYMPK															X
IKBKG															X
PGRMC1																X
DHPS																X
MCCC2																X
SSR3																X
USP11																	X
ITPA																	X
POLR2D																	X
RNMT																	X
DUSP3																		X
PIN1																		X
PPP2R1B																		X
ITGB5																			X			X
APLP1																			X
ANPEP																			X
CALD1																			X
ABLIM1																				X		X
NFKB1																					X
IFIT2																					X
TRIM21																					X
TOR1B																					X
PYGM																						X
CRYAB																						X
PRDX2																							X					X
GBF1																								X
RRAD																									X				X
CYB5R1																									X
FKBP1A																										X
PPM1A																										X
RELA																											X
DFFA																											X
NEK7																												X
CAST																												X
TRIAP1																													X
PTPN14																													X
