# Supplementary material for: Transglutaminase 2 mediates hypoxia-induced selective mRNA translation via polyamination of 4EBPs
Source: Life Sci Alliance. 2020 Feb 19;3(3):e201900565. doi: 10.26508/lsa.201900565 (PMC7032569; doi:10.26508/lsa.201900565)
Supplement: Supplementary file 6 [file LSA-2019-00565_TableS6.xlsx]

## Sheet: Sheet1
Supplemental Table S6. Hallmark gene set analysis for up-regulated proteins in hypoxia+cystamine condition compared to hypoxia
Gene Symbol
KIF1B	X				X
DNM1L	X											X
TPD52	X												X		X
TMED10	X
ERGIC3	X
RAB5A	X
RAB9A	X
SLC25A3		X				X
ATP6V1D		X						X
DLD		X								X				X
IDH3G		X								X				X
SUCLA2		X								X
SLC25A4		X									X
UQCRC1		X												X
NDUFS4		X
NUMA1			X		X
HMMR			X				X
TACC3			X				X
PDS5B			X				X
PML			X
EWSR1			X
CHMP1A			X
TCEA1				X				X
H1F0				X								X	X
PC				X
CDR2				X
NUDT4				X
HEBP1				X
SLC30A1				X
AKAP13					X
ANLN					X
PXN					X
ARHGEF2					X
CDC42					X
PHB						X			X
SRM						X			X
RPL22						X
SRSF3						X
SNRPD3						X
NBN							X			X
NUDT21							X
CYB5B								X			X
FDXR								X				X
SLC1A5								X						X
PPAN									X
LYN											X				X	X		X
CDC5L											X
CREBBP												X
ALDH1A3													X				X
HLA-A															X
GALNT1															X
PLAUR																X	X	X
SERPINC1																X
PREP																X
SERPINA3																	X
KIF5C																	X
